# Supplementary material for: Studies on Insertion/Deletion Residues for Functional Analysis and Improved Amination Activity in Meso-DAPDH from Corynebacterium glutamicum
Source: MDPI journal article supplement (doi:10.3390/catal14040220), 2024-03-22
Supplement: s1 [file s1]

# Supplementary Material

**Table S1.** Primers used in this study.

| Primers   | Sequence (5'-3' Direction)      |
|-----------|---------------------------------|
| CgT44A-F  | CCTCGACACAAAGGCGCCAGTCTTTGATGT  |
| CgT44A-R  | GCGACATCAAAGACTGGCGCCTTTGTGTCG  |
| CgP45A-F  | CGACACAAAGACGGCGGTCTTTGATGTCGC  |
| CgP45A-R  | GACATCAAAGACCGCCGTCTTTGTGTCGAG  |
| CgM216A-F | CGACATCCGCACCGCGCCTGATTACTTCGT  |
| CgM216A-R | GAAGTAATCAGGCGCGGTGCGGATGTCGTT  |
| CgH239A-F | TTCGACTCCGAGGCGACCGGCATGCCACAC  |
| CgH239A-R | GTGGCATGCCGGTTCGCCTCGGAGTCGAAGG |
| CgT240A-F | TTCGACTCCGAGCACGCGGGCATGCCACAC  |
| CgT240A-R | GTGGCATGCCCGCGTGCTCGGAGTCGAAGG  |
| CgG241A-F | GACTCCGAGCACACCGCGATGCCACACGGT  |
| CgG241A-R | CACCGTGTGGCATCGCGGTGTGCTCGGAGT  |
| CgK289A-F | AGCTCACCGCATGGCGCAGCAGGGCCAAAG  |
| CgK289A-R | TGGCCCTGCTGCGCCATGCGGTGAGCTCGG  |
| CgQ290A-F | TCACCGCATGAAGGCGCAGGGCCAAAGCGG  |
| CgQ290A-R | GCTTTGGCCCTGCGCCTTCATGCGGTGAGC  |
| CgQ291A-F | CCGCATGAAGCAGGCGGGCCAAAGCGGAGC  |
| CgQ291A-R | TCCGCTTTGGCCCGCCTGCTTCATGCGGTG  |
| CgG292A-F | CGCATGAAGCAGCAGGCGCAAAGCGGAGCT  |
| CgG292A-R | GAAAGCTCCGCTTTGCGCCTGCTGCTTCAT  |
| CgL176X-F | ATCCGAAGACGCCNNKGAAAAGGCC       |
| CgL176X-R | CCTTTTCMNNGGCGTCTTCGGATGG       |
| CgR180X-F | CTGGAAAAGGCNNKCCGCGGCGAAG       |
| CgR180X-R | TCGCCGCGMNNGGCCTTTTCCAGGG       |
| CgH193X-F | GGAAAGCAAACCNNKAAGCGCCAATCCTTC  |
| CgH193X-R | GCATTGGCGCTTMNNGGTTTGCTTTCGGT   |
| CgM216X-F | ACGACATCCGCACCNKCCCTGATTACTTCG  |
| CgM216X-R | AAGTAATCAGGMNNGGTGCGGATGTCGTTT  |
| CgT240X-F | TTCGACTCCGAGCACNNKGGCATGCCACAC  |
| CgT240X-R | GTGGCATGCCMNNGTGCTCGGAGTCGAAGG  |
| CgK289X-F | CTCACCGCATGNNKCAGCAGGGCCAAAGCG  |
| CgK289X-R | CTTTGGCCCTGCTGMNNCATGCGGTGAGCT  |
| CgQ290X-F | GCTCACCGCATGAAGNNKCAGGGCCAAAGC  |
| CgQ290X-R | TTTGGCCCTGMNNCTTCATGCGGTGAGCTG  |

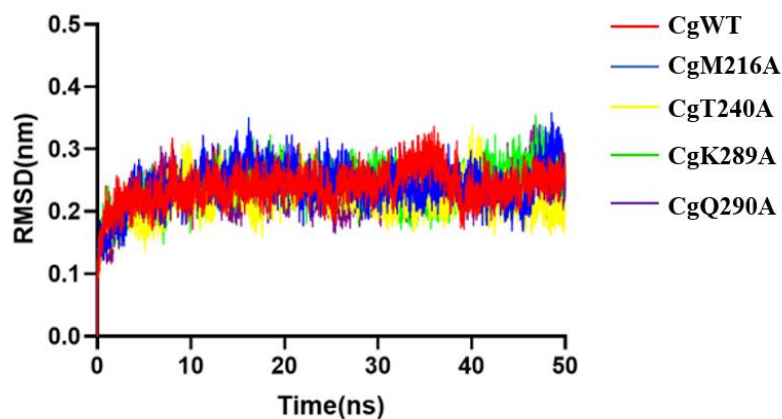

**Figure S1.** RMSD analysis of CgDAPDH and alanine mutants MD simulation trajectory.

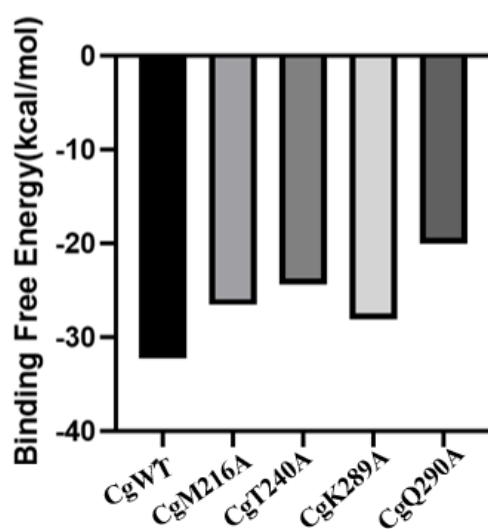

**Figure S2.** Comparison of substrate binding energy between CgDAPDH and alanine mutants.

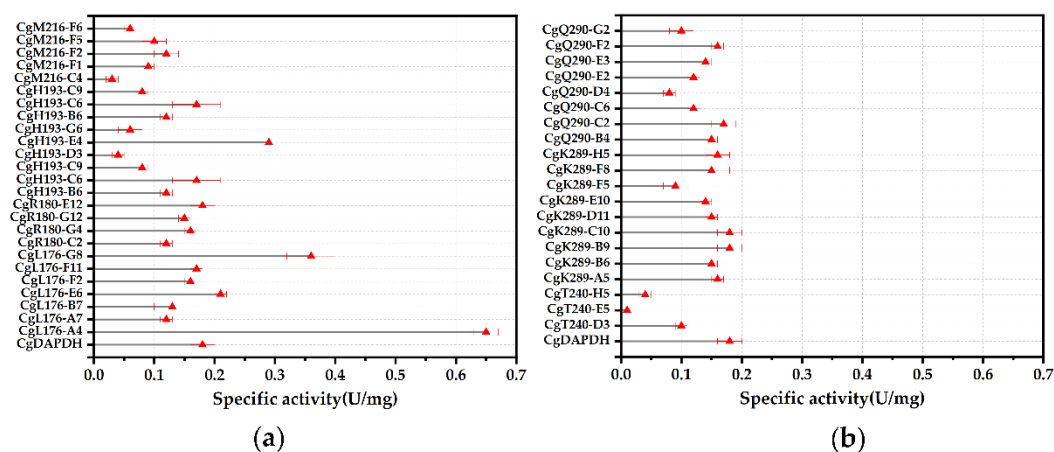

**Figure S3.** Specific activities of CgDAPDH and its positive mutants towards pyruvic acid: (a) Specific activity of positive mutants at site L176, R180, H193 and M216; (b) Specific activity of positive mutants at site T240, K289 and Q290. The number after the mutant's name referred to the number on the 96 deep-well plates during the screening process.
